## **Exploring clinical care pathways of individuals with comorbid mental health disorders after presenting to emergency due to acute musculoskeletal pain: A Narrative Review.**

Priya Arora<sup>1¶\*</sup>, James Michael Elliott<sup>1¶</sup>, Fereshteh Pourkazemi<sup>2¶</sup>

1 Northern Sydney (Arabanoo) Precinct, Sydney School of Health Sciences, Faculty of Medicine and Health, The University of Sydney, Camperdown New South Wales, Australia.

2 Central Sydney (Patyegarang) Precinct, Sydney School of Health Sciences, Faculty of Medicine and Health, The University of Sydney, Camperdown NSW, Australia.

\* Corresponding author e-mail: [Priya.Arora@health.nsw.gov.au](mailto:Priya.Arora@health.nsw.gov.au)

¶¶These authors contributed equally to this work.

## **Exploring clinical care pathways of individuals with comorbid mental health disorders after presenting to emergency due to acute musculoskeletal pain: A Narrative Review**

---

### **Abstract**

Complex Musculoskeletal (MSK) pain conditions are the leading cause of Years Lived with Disability (YLD) globally [1]. Alarming, this has remained the same since 1990 [2] suggesting that research into prevention and rehabilitation of MSK pain over the past 25+ years has had limited effect on its overall global burden. The reasons some fail to report full recovery while others follow a less problematic recovery trajectory are becoming clearer with psychological predictors (anxiety, depression, stress) showing some prognostic value [3]. Effective interventions however have proven elusive. Treatment of chronic MSK pain in many clinical settings tends to focus on the physical modalities such as pharmacologic, surgical, and other physical therapies excluding holistic interventions targeting psychosocial causes [4]. An integrative approach towards assessing and effectively managing a patient's pain should cover the physical, behavioural, and psychosocial drivers of the patient's pain experience. Moreover, a better understanding of the myriad of biopsychosocial mechanisms driving the clinical course for each patient seems particularly germane to the acute care encounter, given the current challenges with pharmaceutical dependence and overutilisation of and reliance on diagnostic tests that rarely inform management; or worse, promote ineffective management.

## INTRODUCTION:

Nine out of ten individuals will report and seek care for their pain following an acute injury involving the musculoskeletal (MSK) system. Recovery from acute MSK injury is expected for the majority, but the same cannot be expected, nor observed, for all, with nearly 2-3 out of 10 transitioning from acute to chronic pain [5]. Individuals' recovery pathways are undoubtedly influenced by factors that extend well beyond the original pain producing injury. In fact, a simple question arises when two people exposed to the same external perturbation (e.g., another car hitting their car while stopped at a red light), have different pathways towards recovery. One may recover spontaneously, while the other may take longer...or may never offer words to suggest they feel, and believe they are, recovered. What factors drive this prolonged experience, and why? Appreciating the rhetorical nature of these questions, one can (and should) consider the many factors influencing these two very different recovery pathways (and disparate therapeutic approaches on offer) following the 'same' injury. [6].

To date, current clinical pathways for acute musculoskeletal (MSK) injury have existed in silos. These pathways typically manage the most common MSK traumatic injuries, namely those to the cervical or lumbar spine and lower limbs, presenting to emergency departments (ED). The current protocols focus on triage to exclude any major distracting injury (e.g., head injury, fracture, spinal cord injury). Once traumatic distracting injury has been excluded or triaged, the focus shifts to a diagnosable injury with management options aimed to discharge with an appropriate medication recommendation, follow up advice or discharge support to primary care or allied health services. These discharge options can influence the clinical course, and in some, not all, cases, increase risk for adverse effects.[7]

Individual guidelines [8, 9] exist for MSK trauma in primary care, but these are not targeted to prognostic risk in the primary care, post-discharge, environment. The disparate

experience in the primary care encountered is often driven by professional scope-of-practice and guidelines that exist for each body regions and condition...and for each profession [10]. For example, across Australia, appropriate/consistent advice on management of non-traumatic low back pain is provided in only 20% of GP consultations [11]. In neck pain disorders, over 50% of people receive, what is considered, unnecessary imaging [12], and substantial gaps exist between evidence-based guidelines and clinical management of lower limb injuries[13]. It has been suggested that nearly all care pathways fail to consider prognostic risk [14], resulting in delayed care for those at higher risk (poorer prognosis) and care for those at lower risk (good prognosis), considered to be ineffective, and in some cases, harmful [15, 16].

This non-systematic literature review aims to examine the evidence on care pathways of individuals presenting to an emergency department due to acute MSK pain, with pre-existing comorbid mental health (M.H.) disorders and for a reported mental illness (M.I.).

## **METHODS**

### ***Database search***

The authors undertook a comprehensive search across six electronic databases of MEDLINE, PubMed, PsycINFO, Embase, CINAHL and Google Scholar, using the keywords and search strategy, provided in table 1. The search strategy was modified where required, for other databases.

Inclusion criteria: studies were included if they were full published peer-reviewed studies written in English since 2010 onwards. The participants were adults (18 years and older) with acute MSK pain presentations. The study setting was at the emergency department, looking at the clinical pathways for the people presenting with mental health issues as compared to others.

Exclusion criteria: studies were excluded if the publications captured non-MSK presentations; drug & alcohol related issues; traumatic injuries; cognitive impairment; requiring surgical interventions; not clearly defined age limits.

In consultation with an expert librarian, a literature search was completed using the following terms. The search strategy was modified accordingly, in each database to include MSK pain, systems and disorders along with mental illness or disorder with emergency settings/ hospitals/ services looking at adult populations from 2010 onwards. At the conclusion of the search, results were exported to EndNote citation software for screening.

|             |                                                                                                                                          |
|-------------|------------------------------------------------------------------------------------------------------------------------------------------|
| Terms used: | <i>MEDLINE® All including Epub Ahead of Print, In-Process &amp; Other Non-Indexed Citations, Daily and Versions® &lt;2010 – 2023&gt;</i> |
| 1           | exp Musculoskeletal Pain/                                                                                                                |
| 2           | exp Musculoskeletal System/                                                                                                              |
| 3           | exp Musculoskeletal Diseases/                                                                                                            |
| 4           | exp Neck Pain/                                                                                                                           |
| 5           | exp Back Pain/                                                                                                                           |
| 6           | exp Shoulder Pain/                                                                                                                       |
| 7           | ((musculoskeletal* or cervical* or MSK or neck* or back* or hip* or bone* or joint* or muscle* or shoulder*) adj3 pain*).mp.             |
| 8           | exp Mental Disorders/                                                                                                                    |
| 9           | exp Anxiety/                                                                                                                             |
| 10          | exp Depression/                                                                                                                          |
| 11          | exp Schizophrenia/                                                                                                                       |
| 12          | (mental disorder* or mental illness* or psychiatric disorder* or psychiatric illness*).mp.                                               |
| 13          | exp Emergency Service, Hospital/                                                                                                         |
| 14          | (emergency unit* or emergency ward* or emergency room* or “accident and emergency” or ED).mp.                                            |
| 15          | 1 or 2 or 3 or 4 or 5 or 6 or 7                                                                                                          |
| 16          | 8 or 9 or 10 or 11 or 12                                                                                                                 |
| 17          | 13 or 14                                                                                                                                 |

|    |                              |
|----|------------------------------|
| 18 | 15 and 16 and 17             |
| 19 | limit 18 to English language |
| 20 | limit 19 to last few years   |
| 21 | Adult population             |
| 22 | English language             |

### ***Literature Screening***

The first author (PA) screened studies based on the inclusion criteria, by going through titles and abstracts, and then full papers. The following data items were extracted from the included studies comprising of study characteristics including the year, author, setting, participants demographics, intervention and care pathways (where reported). Identified publications and articles were synthesised using narrative synthesis. The narrative synthesis was conducted using the structure provided by Popay, et al [17]. Exploring themes of findings involves identifying common patterns and insights across studies on interventions in acute settings.

Our search strategy identified 75 papers and after screening against inclusion criteria, 36 studies were included for data extraction and reporting in our narrative review (Figure 1).

The included studies were a combination of systematic (n=6), literature (n=4) or scoping (n=2) reviews, cross-sectional qualitative (n=5) or quantitative (n=4) studies, retrospective chart reviews (n=3), case studies/reports (n=3), clinical linkage studies (n=1), clinical studies (n=4), a randomised clinical study, and a Delphi study. Further two studies included secondary analysis of data from survey-based studies; one across 82 EDs in New South Wales (NSW)), and another from approximately 15,000 participants rating the care they received. These studies focussed on people with an existing diagnosis of a mental illness or mental disorder accessing emergency care for acute MSK pain presentations. The studies investigated a variety of backgrounds including culturally and linguistically diverse, physiological and mental wellbeing, socioeconomic impact and factors such as re-attendance rates.

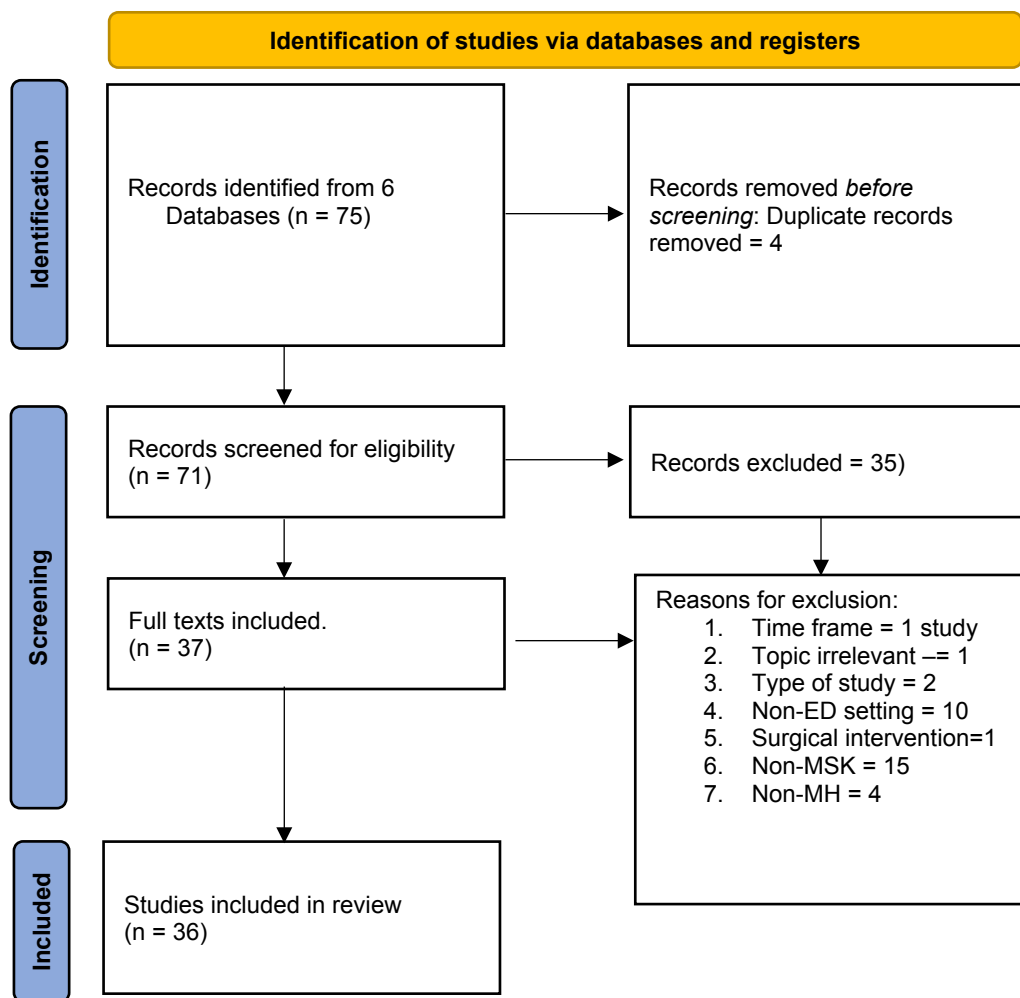

Figure 1: Flow diagram of studies



## **Literature Synthesis**

After data extraction, and synthesis of findings, we identified four main themes within the study outcomes which we will further expand upon. These included: the prevalence of concurrent pain and mental health presentations to ED; the screening and triage process for people with MKS pain when presented to ED settings; the impact of mental illness on diagnostic overshadowing and emergency staff attitude. The summary of studies is provided in the supplementary tables. The existing literature in the field focuses on a variety of MSK presentations from traumatic injuries to exacerbation of pre-existing MSK concerns and the various assessments and screening tools used to provide pain relief via medication and non-pharmacological approaches including follow up care in the community that affect continuity of care and improve patient outcomes post ED presentations.

### ***1. Concurrent pain and mental health disorder presentations to ED***

Acute pain management, which accounts for nearly 80% of ED visits [18], remains a critical issue and often presents as intertwined with mental health issues and other physical chronic conditions. This theme emerged as an overview of the available literature addressing pain related challenges within ED settings, such as, overuse, psychiatric comorbidities, and the ongoing need for effective management strategies. Studies reporting the overuse of ED services by patients with chronic conditions such as lower back pain and recurrent abdominal pain, underscoring the necessity for person centred care management approaches to redirect these cases to more appropriate care settings [18-20]. Concurrently, psychiatric comorbidities such as anxiety, depression, and PTSD significantly impact pain experiences and treatment outcomes in ED settings, emphasising the crucial role of integrating mental health considerations into pain management protocols [21-23].

Moreover, disparities in pain management experiences among different demographic groups underscore the importance of targeted interventions to promote equitable healthcare practices and address systemic inequities [15, 24, 25]. Existing literature links multiple

emergency presentations in the context of MSK pain and the likelihood of experiencing a concurrent mental illness [22; 24; 26; 15; 20], particularly an existing post-traumatic stress disorder (PTSD) diagnosis and chronic pain, living in the inner city and low income [21] experiencing increasing vulnerabilities due to low income and lack of social support.

## ***2. Screening and Triage of Patients with MSK Pain and Mental Health Disorders in ED***

The evidence highlights that pain assessment and management, MSK disorders, and psychiatric presentations are concurrent challenges commonly encountered by ED and triage clinicians [27]. For acute pain presentations at ED, the triage staff have to balance pain management, while prescribing pain-reducing medications (e.g., opioids) with potential risks associated, including dependency [28]. The role of triage staff making care decisions is pivotal in the management of acute pain presentations at the ED and plays an important role in preventing further deterioration and mitigating associated care burden.

The experiences of people with a pre-existing mental health condition attending ED have revealed care pathway disparities that can lead to future presentations, repeated attendances, exploration and delays in appropriate intervention [29]. Discrimination and bias by triage staff may contribute to poorer outcomes and inequitable treatment and care pathways [30, 31]. Further, the influence of psychosocial factors on recovery of acute MSK presentations underlines an urgent need for comprehensive assessments and suitable interventions tailored to the person and their circumstances [16].

## ***3. Diagnostic Overshadowing of Patients with MSK and mental health disorders in ED setting***

The term, 'diagnostic overshadowing' is used to detail the clinical undertakings of health professionals when assuming that the behaviour of a person with cognitive disabilities is the primary driver behind their presentation of disability, without exploring/identifying other biological or social determinant drivers [32]. The practice of diagnostic overshadowing spans all care settings, but the practice of, and consequences from, such practice could, probably does, lead to a lack of consideration of many common comorbid psychopathologies in

persons seeking care for physical ailments and thus, the delivery of inappropriate care with increased risk to the person...and undue burden to the treating workforce.

Across included and reviewed literature, diagnostic overshadowing was identified and linked to discrimination and bias displayed by triage staff [54, 56, 59, 63, 64]. The synthesis of the studies demonstrated the impact on patients living with mental health concerns, their pain management and care pathways [33 - 35], clinical decision making, [36 - 38]. This led to poorer outcomes for people attending along with inequity to treatment pathways and increased chances of representation which is indeed commonly seen in clinical practice.

An existing review of the literature looking at ED presentations relating to pain issues whilst living with a mental illness or disorder, suggests that people with mental health issues typically receive a different standard of care, leading to increased rates of undiagnosed conditions, poorer outcomes, which in turn prevents them from accessing further intervention, increasing the likelihood of premature mortality [32] [39]. Addressing diagnostic overshadowing within triage settings requires acknowledgement, trauma - informed care, self-reflection and collaboration between physical and mental health multidisciplinary teams [40, 32, 34, 36, 37, 38]. While healthcare professionals do not intentionally discriminate against people with a background of mental health issues, it is important to build trust and rapport and apply the same diagnostic rigor they would apply to other people without a background of MH issues.

#### ***4. Emergency Staff Attitude Towards Patients with Mental Health Disorders***

This theme emerged from studies identifying the mental health stigma associated with attending an ED and the challenges faced by ED clinicians to understand the attitudes, perceptions and experiences of triage clinicians offering insight into healthcare delivery.

There are diverse approaches used by different ED clinicians to address pain management challenges within ED environments to address acute and chronic pain effectively [41].

Across all these diverse approaches, healthcare providers' attitudes and treatment recommendations are impacted by serious mental illness or having disadvantaged backgrounds in individuals presenting to ED with acute MSK pain. Provider perceptions, biases, and conceptualisations have shown to significantly influence care delivery and patient outcomes in these populations [18, 42, 43]. These studies suggest that implicit biases lead to less effective treatment recommendations, emphasizing the critical need to address these biases to achieve equitable treatment outcomes for all patients, especially those from disadvantaged backgrounds.

The literature highlights the pervasive stigma towards individuals with mental health conditions within ED settings. Stigma impacts patient experiences and access to appropriate care pathways, necessitating interventions to promote inclusivity and reduce discrimination [43]. The concerns identified in the literature include prolonged stays in the emergency department (ED) for individuals with mental health conditions, often attributed to extended assessments or systemic issues [43]. Patients and families frequently report feeling they are given lower priority during triage when seeking mental health services in the ED [33]. Furthermore, individuals with mental health conditions often believe their physical complaints are not treated as seriously as those of patients without a mental health history [35]. Additionally, there is a perception that individuals with mental health conditions may be seen as manipulative by the treating team, which further impacts their experience in the ED [44]. Training and preparedness among emergency nurses in generalist ED settings influence interactions with patients presenting with psychiatric comorbidities. This underscores the importance of tailored training programs to equip ED staff with the necessary skills and sensitivity [45]. Efforts to involve patients in their treatment decisions and improve clinician training are identified as crucial strategies to mitigate stigma and bias in emergency healthcare settings [30, 31, 33, 35].

In summary, these collectively highlight the complexity of pain management and mental health care within ED settings, placing an emphasis on the need for comprehensive

approaches to address clinician perspectives, training gaps, stigma reduction, and tailored care pathways.

## Discussion

This non-systematic literature review highlights that individuals living with mental health illness have different experiences of accessing emergency care for acute MSK pain within EDs than those not living with mental health illness, potentially impacting their care pathways after an acute MSK pain.

Individuals with acute MSK pain and mental health emergencies often face stigma with the possibility that diagnostic overshadowing could influence assessment, triage, and management. These factors tend to negatively impact outcomes by influencing access to the most appropriate care pathways, due to clinician biases, both conscious and unconscious alongside other modifiable factors (e.g. gaps in training and a lack of multidisciplinary input).

Effective management requires a wholistic, time-efficient, approach integrating pain relief with mental health support, whilst considering social factors, and carefully balancing medications to avoid worsening these conditions [46, 47]. Recognising these complex needs and ensuring comprehensive assessments and care plans are imperative to address the physical symptoms of, and mental health challenges experienced by, many patients.

It is noted that the difficulties with accessing treatment for physical symptoms tend to be further impacted by busy triage settings with limited resourcing and time constraints as the presentations can be challenging to differentiate clinically. But, collaborative care models, featuring multidisciplinary teams comprising ED physicians, nurses, and allied health practitioners, pain specialists, mental health liaisons, and primary care providers, have shown promise in ensuring comprehensive care [18, 26, 28, 38].

The variations across perceptions of wellness and illness have been documented and demonstrate strong links between emotional regulation, existing mental health diagnoses or underlying vulnerabilities and pain, and how these influence recovery. There are frameworks to highlight the complexities that different people present with in case of a health crisis (physical or mental health), which provide foundation for clinicians to better understand the

many causes of and contributors to illness (e.g. individual traits, genetics, social influences, variances in cultural perceptions of disease and views on recovery). Understanding the interplay of these factors informs care decisions when made in consultation with the person seeking/requiring support and considering their previous, current, and future psycho-social circumstances.

## CONCLUSION

Concurrent presentations of pain and mental health disorders in the ED highlight the need for a nuanced understanding of these complex interactions. By focusing on integrated assessment, collaborative care models, education, community resources, and patient-centred approaches, healthcare providers can better support these vulnerable patients. Addressing these challenges holistically not only improves immediate care but also promotes long-term health and well-being... on a patient-by-patient basis.

**Table 1: Overview of Literature Pertaining to Emergency Department Visits for Acute Pain Complaints in People with Mental Health Conditions**

| No. | Year | Author                                                                                                                                                                           | Title                                                                                                                                     | Study Design                   | Country, Setting,                             | Study Population                                  | Age range          | Diagnosis of Mental Health | Main findings                                                                                                                                                                                                                         |
|-----|------|----------------------------------------------------------------------------------------------------------------------------------------------------------------------------------|-------------------------------------------------------------------------------------------------------------------------------------------|--------------------------------|-----------------------------------------------|---------------------------------------------------|--------------------|----------------------------|---------------------------------------------------------------------------------------------------------------------------------------------------------------------------------------------------------------------------------------|
| 1   | 2023 | Felix, F., Oliveira, E., Silva, S. C. & Agualusa, L.                                                                                                                             | The overuse of the emergency department at a multidisciplinary pain clinic by patients with chronic pain: A cross-sectional study.        | Cross sectional study          | Portugal; Emergency department (ED); Portugal | ED users                                          | Adults             | Not specified              | <ul style="list-style-type: none"> <li>Pain presentations account for 78% ED presentations.</li> <li>Improving liaison with primary care providers to prevent recurring presentations.</li> </ul>                                     |
| 2   | 2023 | Peairs, E. M., Chari, T., Kuehn, S. J., Valan, B., Rowe, D. G., Hurley, E. T., Aitchison, A. H., Paul, A. V., Henriquez, A., Hendren, S., Lentz, T. A., Péan, C. A. & Debaun, M. | The association of pre-existing mental health conditions and patient outcomes after lower extremity orthopaedic trauma: A scoping review. | Scoping review                 | Pre-operative setting/s                       | Non-geriatric                                     | 18 years and older | Anxiety; depression        | <ul style="list-style-type: none"> <li>Demonstrated existing links between MH conditions and post operative complications.</li> <li>Existing MH history increased the likelihood of chronic regional pain syndrome (CRPS).</li> </ul> |
| 3   | 2022 | Basinski, K., Zdun-Ryzewska, A. &                                                                                                                                                | Psychological and sociodemographic predictors of chronic low back pain in                                                                 | Clinical study (Observational) | Poland; ED                                    | First episode of non-specific acute low back pain | Not defined        | Not specified              | Inclusion of a simple self-rated health measurement scale in future clinical practice                                                                                                                                                 |



|   |      |                                                                                                                                               |                                                                                                                                                           |                               |                                                         |                                                      |                              |                     |                                                                                                                                                                                                                                                                                               |
|---|------|-----------------------------------------------------------------------------------------------------------------------------------------------|-----------------------------------------------------------------------------------------------------------------------------------------------------------|-------------------------------|---------------------------------------------------------|------------------------------------------------------|------------------------------|---------------------|-----------------------------------------------------------------------------------------------------------------------------------------------------------------------------------------------------------------------------------------------------------------------------------------------|
|   |      | Majkowicz, M.                                                                                                                                 | patients presenting to emergency departments.                                                                                                             | cohort study)                 |                                                         |                                                      |                              |                     | to assess risks of persistent pain.                                                                                                                                                                                                                                                           |
| 4 | 2022 | Oliveira, J. E. S. L., Prakken, S. D., Meltzer, A. C., Broder, J. S., Gerberi, D. J., Upadhye, S., Carpenter, C. R. & Bellolio, F.            | Depression and anxiety screening in emergency department patients with recurrent abdominal pain: An evidence synthesis for a clinical practice guideline. | Systematic review             | USA; ED                                                 | ED presentations for undifferentiated abdominal pain | Over the age of 18 years old | Depression; anxiety | <ul style="list-style-type: none"> <li>No studies found on the effect of screening patients with recurrent and undifferentiated abdominal pain presentations at ED.</li> <li>The study group with abdominal pain was noted to have 10 -29% depression rates and 18 – 50 % anxiety.</li> </ul> |
| 5 | 2022 | Wally, M. K., Hsu, J. R. & Seymour, R. B.                                                                                                     | Musculoskeletal pain management and patient mental health and well-being.                                                                                 | Literature review             | USA; ED; orthopaedic trauma clinic; inpatient setting/s | Orthopaedic trauma patients                          | Not specified                | Depression; anxiety | <ul style="list-style-type: none"> <li>Using multimodal approaches to screen for MH conditions within ED settings assists with improved pain management.</li> <li>Pain is a major cause of decline in MH.</li> </ul>                                                                          |
| 6 | 2022 | Davidson, S. R. E., Bolsewicz, K., Kamper, S. J., Haskins, R., Petkovic, D., Feenan, N., Smith, D., O'flynn, M., Pallas, J. & Williams, C. M. | Perspectives of emergency department clinicians on the challenges of addressing low back pain in the emergency setting: A qualitative study.              | Qualitative exploratory study | Australia; ED                                           | People with lower back pain presentations to ED      | Not specified                | Not specified       | <ul style="list-style-type: none"> <li>Barriers to recovery post lower back pain presentations at ED</li> <li>Clinicians recommended guidelines to improve care pathways.</li> </ul>                                                                                                          |

|    |      |                                                                                                                 |                                                                                                                            |                                         |                                                   |                                                                                             |                 |                                      |                                                                                                                                                                                                                     |
|----|------|-----------------------------------------------------------------------------------------------------------------|----------------------------------------------------------------------------------------------------------------------------|-----------------------------------------|---------------------------------------------------|---------------------------------------------------------------------------------------------|-----------------|--------------------------------------|---------------------------------------------------------------------------------------------------------------------------------------------------------------------------------------------------------------------|
| 7  | 2022 | Blind, F., Melton, J., Karp, J., Oldano, K., Homa, K., Blanco, A., Leoni, R. & Pazanes e, A.                    | Evaluation of the use of individualized patient care plans in frequent emergency department visitors with pain complaints. | Retrospective review                    | USA; ED/ER                                        | People with a pain condition                                                                | 0 – 64-year-old | Pre-existing MH & physical diagnoses | <ul style="list-style-type: none"> <li>Individualised care plans for patients.</li> <li>MDT involvement for discharge planning.</li> </ul>                                                                          |
| 8  | 2022 | Gagnon, R., Perreault, K., Guertin, J. R., Berthelot, S., Achou, B. & Hébert, L. J.                             | Health-related quality of life of patients presenting to the emergency department with a musculoskeletal disorder.         | Cross sectional analyses as part of RCT | Canada; ED (academic)                             | Presentations with minor MSKD                                                               | 18 – 80 years   | Included along with QoL scores       | <ul style="list-style-type: none"> <li>Changes to QoL &amp; association between socio-demographic &amp; clinical variables.</li> </ul>                                                                              |
| 9  | 2022 | Eze, B., Kumar, S., Yang, Y., Kilcoyne, J., Starkweather, A. & Perry, M. A.                                     | Bias in musculoskeletal pain management and bias-targeted interventions to improve pain outcomes: A scoping review.        | Scoping Review                          | USA; Not further specified. 13 articles included  | 948,299 participants/ 881 clinicians. Looking at bias/prejudice/discrimination AND MSK pain | All age groups  | Not specified                        | <ul style="list-style-type: none"> <li>Identification of clinician bias &amp; appropriate identification of care required.</li> <li>Use of community outreach services to support care in the community.</li> </ul> |
| 10 | 2021 | Bailes, A. H., Navlani, R., Koscomb, S., Malecky, A., Marroquin, O. C., Wasan, A. D., Gutstein, H. B., Delitto, | Use of healthcare resources in patients with low back pain and comorbid depression or anxiety.                             | Systematic review                       | Not specified. Outpatient academic medical centre | Data from 513,088 unique patients seen between January 2010 and July 2020                   | Not specified   | Comorbid depression & anxiety        | <ul style="list-style-type: none"> <li>Existing MH conditions are a risk factor for increased use of healthcare.</li> </ul>                                                                                         |

|        |          |                                                                                      |                                                                                                                                                                                 |                        |                          |                                                                                                                                                            |                             |                                         |                                                                                                                                                                                                                             |
|--------|----------|--------------------------------------------------------------------------------------|---------------------------------------------------------------------------------------------------------------------------------------------------------------------------------|------------------------|--------------------------|------------------------------------------------------------------------------------------------------------------------------------------------------------|-----------------------------|-----------------------------------------|-----------------------------------------------------------------------------------------------------------------------------------------------------------------------------------------------------------------------------|
|        |          | A.,<br>Zigler,<br>C., Vo,<br>N. &<br>Sowa,<br>G. A.                                  |                                                                                                                                                                                 |                        |                          |                                                                                                                                                            |                             |                                         |                                                                                                                                                                                                                             |
| 1<br>1 | 202<br>1 | Flynn, S. B.,<br>Gordee, A.,<br>Kuchibhatla, M.,<br>George, S. Z. &<br>Eucker, S. A. | Moving toward patient-centered care in the emergency department: Patient-reported expectations, definitions of success, and importance of improvement in pain-related outcomes. | Cross sectional survey | USA; ED                  | Emergency MSK presentations (n = 210)                                                                                                                      | Adults (18 years and older) | Emotional distress; anxiety; depression | <ul style="list-style-type: none"> <li>Combination of wholistic interventions including pharmacological &amp; non-pharmacological (therapy – CBT).</li> <li>ED initiated physical therapy via a physiotherapist.</li> </ul> |
| 1<br>2 | 202<br>1 | Gonzales, L.,<br>Lopez-Aybar, L. &<br>Mccullough, B.                                 | Variation in provider attitudes and treatment recommendations for individuals with schizophrenia and additional marginalized identities: A mixed-method study.                  | Mixed method study     | USA; Not specified       | Primary pain complaint & schizophrenia. Demographics considered were race (Black/ White); Homeless; Criminal history; 246 providers & 98 community members | Not specified               | Schizophrenia                           | <ul style="list-style-type: none"> <li>Allied health professional had shown lesser stigma as compared to medical professionals.</li> <li>MH training assists with lowering associated stigma.</li> </ul>                    |
| 1<br>3 | 202<br>1 | Corscadden, L.,<br>Callander, E. J.,<br>Topp, S. M. &<br>Watson, D. E.               | Disparities in experiences of emergency department care for people with a mental health condition.                                                                              | Secondary analyses     | Australia; 82 EDs in NSW | 15,995 presentations                                                                                                                                       | Not specified               | MH conditions                           | Improvement of care is dependent on understanding the experiences of people with MH attending ED & further reduce re-presentation.                                                                                          |
| 1<br>4 | 202<br>1 | Henriques, V. &<br>Henriques, S.                                                     | Algoneurodystrophy in a patient with major depressive disorder.                                                                                                                 | Case Report            | Portugal; ED             | 1                                                                                                                                                          | Adult; 45 y/o               | Conversion & major depressive disorder  | The importance of including clinical history & physical symptoms in people with                                                                                                                                             |

|    |      |                                                                                                                                            |                                                                                                                                                                      |                                   |                                                         |                                   |                    |                                                  |                                                                                                                                                                                                                                                                       |
|----|------|--------------------------------------------------------------------------------------------------------------------------------------------|----------------------------------------------------------------------------------------------------------------------------------------------------------------------|-----------------------------------|---------------------------------------------------------|-----------------------------------|--------------------|--------------------------------------------------|-----------------------------------------------------------------------------------------------------------------------------------------------------------------------------------------------------------------------------------------------------------------------|
|    |      |                                                                                                                                            |                                                                                                                                                                      |                                   |                                                         |                                   |                    |                                                  | comorbid MH conditions.                                                                                                                                                                                                                                               |
| 15 | 2021 | O'Connell, F., Osiyemi, N., Saliba, Z., Mortimer, N. & Pourmand, A.                                                                        | Reduced pain perception in patients with schizophrenia; a missed case of hand fracture.                                                                              | Case report                       | USA; ED                                                 | 1                                 | Adult              | Schizophrenia                                    | Cognitive factors may cause differences in pain perception in people with existing MH conditions.                                                                                                                                                                     |
| 16 | 2021 | Lee, K. C., Chuang, S. K. & Eisig, S. B.                                                                                                   | Is psychiatric illness associated with the clinical decision to treat facial fractures?                                                                              | Cross sectional review            | USA. Nationwide ED sampling                             | 59,378; 10,485 had a MH diagnosis | Not specified      | Psychiatric illness                              | Patients with a MH condition have higher rates of admission & severe patterns of injuries.                                                                                                                                                                            |
| 17 | 2021 | Bueter, A.                                                                                                                                 | Diagnostic overshadowing in psychiatric-somatic comorbidity: A case for structural testimonial injustice                                                             | Literature review                 | Denmark / Nordic countries . ED                         | 39 ED clinicians                  | Not specified      | Severe MI (schizophrenia; MDD; bipolar disorder) | <ul style="list-style-type: none"> <li>Pre-existing MI cause repeated presentations and delayed diagnosis affecting interventions.</li> <li>Psychosocial B/g affects care in busy &amp; high-pressure ED environments.</li> </ul>                                     |
| 18 | 2021 | Cvejic, R. C., Srasueb kul, P., Walker, A. R., Reppermund, S., Trollor, J. N., Lappin, J. M., Curtis, J., Ward, P., Samaras, K. & Dean, K. | The health service contact patterns of people with psychotic and non-psychotic forms of severe mental illness in new south wales, Australia: A record-linkage study. | Record linkage study/cohort study | Australia. ED; public hospitals & ambulatory MH service | 169,306                           | 12 years and above | 63110 had a psychotic illness/ severe MI         | <ul style="list-style-type: none"> <li>Developing care processes to support the physical health of people with severe MI.</li> <li>Increased service provisions &amp; changes in MH policy.</li> <li>Integrated models of care to improve health outcomes.</li> </ul> |
| 19 | 2020 | Ring, J., Peskoe, S., Zhao, C.,                                                                                                            | Depression and functional outcomes in patients                                                                                                                       | Secondary analyses                | USA; ED                                                 | 674                               | ≥21 years          | Depressive symptoms                              | <ul style="list-style-type: none"> <li>Increased severity of depressive symptoms is</li> </ul>                                                                                                                                                                        |

|    |      |                                                                                                                                                                      |                                                                                                                                                                                          |                                            |         |               |                                        |                      |                                                                                                                                                                                                                                                                        |
|----|------|----------------------------------------------------------------------------------------------------------------------------------------------------------------------|------------------------------------------------------------------------------------------------------------------------------------------------------------------------------------------|--------------------------------------------|---------|---------------|----------------------------------------|----------------------|------------------------------------------------------------------------------------------------------------------------------------------------------------------------------------------------------------------------------------------------------------------------|
|    |      | Friedman, B. W., George, S. Z., Eucker, S. A. & Quest, T. E.                                                                                                         | presenting to the emergency department with low back pain.                                                                                                                               |                                            |         |               |                                        |                      | <ul style="list-style-type: none"> <li>associated with increased pain and disability and lesser improvement post ED presentation.</li> <li>The importance of early recognition of depressive symptoms as a risk for acute pain progressing to chronic pain.</li> </ul> |
| 20 | 2020 | Burns, J. W., Janssen, I., Lillis, T., Mulcahy, M., Purim-Shem-Tov, Y. A., Bruehl, S., Burgess, H. J., Fischer, A., Rim, K., Aranda, F., Pinkerton, L. & Hobfoll, S. | The transition from acute to persistent pain: The identification of distinct trajectories among women presenting to an emergency department.                                             | Clinical study (Longitudinal cohort study) | USA; ED | Women (n=375) | 18 – 40 years old; premenopausal women | PTSD                 | Demographics affect recovery pathways as do socio-economic factors, particularly over subsequent ED visits.                                                                                                                                                            |
| 21 | 2020 | Lexne, E., Nylander, P.O., Brudin, L., Marteinsdottir, I. & Strain, J. J.                                                                                            | Psychiatric symptoms among patients with acute abdominal pain: Patients with organic dyspepsia report more psychiatric symptoms and rate poorer general health compared to patients with | Randomised clinical trial                  | UK; ED  | N=137         | Not specified                          | Anxiety & depression | Important to consider psychiatric comorbidity at triage within ED presentations to assist with treating clinicians' formulations and intervention                                                                                                                      |

|    |      |                                                                                                            |                                                                                                                                                                                                 |                               |                                                    |                                                                                    |                     |                                                                    |                                                                                                                                                                                                                              |
|----|------|------------------------------------------------------------------------------------------------------------|-------------------------------------------------------------------------------------------------------------------------------------------------------------------------------------------------|-------------------------------|----------------------------------------------------|------------------------------------------------------------------------------------|---------------------|--------------------------------------------------------------------|------------------------------------------------------------------------------------------------------------------------------------------------------------------------------------------------------------------------------|
|    |      |                                                                                                            | other specific abdominal diagnoses and non-specific abdominal pain at an emergency ward.                                                                                                        |                               |                                                    |                                                                                    |                     |                                                                    |                                                                                                                                                                                                                              |
| 22 | 2020 | Bijker, L., Sleijser-Koehorst, M. L. S., Coppeters, M. W., Cuijpers, P. & Scholten-Peeters, G. G. M.       | Preferred self-administered questionnaires to assess depression, anxiety and somatization in people with musculoskeletal pain - a modified Delphi study.                                        | Delphi study                  | The Netherlands; Not specified                     | N=22 international experts                                                         | Not specified       | Anxiety, somatisation & depression                                 | Pre-existing MH affects recovery from MSK pain                                                                                                                                                                               |
| 23 | 2020 | Molloy R. Munro I. & Pope, N.                                                                              | Understanding the experience of diagnostic overshadowing associated with severe mental illness from the consumer and health professional perspective: A qualitative systematic review protocol. | Qualitative Systematic Review | Australia. Acute healthcare facilities & services. | Qualitative studies looking at diagnostic overshadowing in people with existing MI | Older than 16 years | Schizophrenia, bipolar disorder; personality disorders, depression | <ul style="list-style-type: none"> <li>Inequities in healthcare lead to reduced life expectancy for MH consumers</li> </ul>                                                                                                  |
| 24 | 2019 | Thrasler, T. W., Schneider, J., Rolli, M., Redwood, R. S., Peterson, M. J., Maurer, L. & Repplinger, M. D. | 'Medical clearance' of patients with acute mental health needs in the emergency department: A literature review and practice recommendations.                                                   | Literature review             | USA; ED                                            | People with existing MH conditions attending ED & requiring medical clearance      | Not specified       | MI – not further defined                                           | <ul style="list-style-type: none"> <li>Detailed physical &amp; MH assessments are necessary for holistic care planning.</li> <li>Open discussion between ED physicians &amp; MH consultant liaison is imperative.</li> </ul> |

|    |      |                                                                                                                                               |                                                                                                                                                                       |                                                      |                                       |                 |                       |                                       |                                                                                                                                                                                                                                          |
|----|------|-----------------------------------------------------------------------------------------------------------------------------------------------|-----------------------------------------------------------------------------------------------------------------------------------------------------------------------|------------------------------------------------------|---------------------------------------|-----------------|-----------------------|---------------------------------------|------------------------------------------------------------------------------------------------------------------------------------------------------------------------------------------------------------------------------------------|
| 25 | 2018 | Lillis, T. A., Burns, J., Aranda, F., Purim-Shem-Tov, Y. A., Bruehl, S., Beckham, J. C. & Hobfoll, S. E.                                      | PTSD symptoms and acute pain in the emergency department: The roles of vulnerability and resilience factors among low-income, inner-city women.                       | Clinical study (cross sectional observational study) | USA; ED                               | Women (adults); | Mean age 28 years old | PTSD                                  | PTSD symptoms affect acute pain responses via psychosocial vulnerability factors                                                                                                                                                         |
| 26 | 2018 | Motov, S., Strayer, R., Hayes, B. D., Reiter, M., Rosenbaum, S., Richman, M., Repanshek, Z., Taylor, S., Friedman, B., Vilke, G. & Lasoff, D. | The treatment of acute pain in the emergency department: A white paper position statement prepared for the American academy of emergency medicine.                    | Literature search                                    | USA; ED                               | Not specified   | Not specified         | Opioid users                          | <ul style="list-style-type: none"> <li>The importance of opioid &amp; non opioid options for treating acute pain within ED settings to provide patient centred interventions.</li> <li>Shared decision making with consumers.</li> </ul> |
| 27 | 2018 | Brunero, S., Nicholls, D., Ramjan, L. M. & Salamons, Y.                                                                                       | Generalist health professional's interactions with consumers who have a mental illness in nonmental health settings: A systematic review of the qualitative research. | Systematic review                                    | Australia; Non-MH/generalist settings | Not specified   | Not specified         | Mental illness; not further described | The importance of knowledge of MI to provide care with non-MH settings.                                                                                                                                                                  |

|    |      |                                                                                                                          |                                                                                                                                                            |                                                                                                         |         |                                              |                                                  |                                               |                                                                                                                                                                                                                                            |
|----|------|--------------------------------------------------------------------------------------------------------------------------|------------------------------------------------------------------------------------------------------------------------------------------------------------|---------------------------------------------------------------------------------------------------------|---------|----------------------------------------------|--------------------------------------------------|-----------------------------------------------|--------------------------------------------------------------------------------------------------------------------------------------------------------------------------------------------------------------------------------------------|
| 28 | 2018 | Chennapan, K., Landau, M. J., Mullina, S., Seupaul, R. A., Nordstrom, K., Anderson, E. & Wilson, M. P.                   | Medical screening of mental health patients in the emergency department: A systematic review.                                                              | Systematic review                                                                                       | USA; ED | 60 articles included                         | Not specified                                    | Psychiatric complaints; not further described | <ul style="list-style-type: none"> <li>A full medical and psychiatric history assessment is important for care planning.</li> <li>Urine screens tend to not be helpful and cause further distress.</li> </ul>                              |
| 29 | 2018 | Geiss, M., Chamberlain, J., Weaver, T., McCormick, C., Rauffer, A., Scoggins, L., Peterse, L., Davis, S. & Edmondson, D. | Diagnostic overshadowing of the psychiatric population in the emergency department: Physiological factors identified for an early warning system.          | Retrospective cohort design of 133 psychiatric admissions were reviewed between the years 2011 and 2015 | USA; ED | 133 psychiatric admissions over 2011 – 2015  | Adults; not further described                    | Psychiatric illness (not further described)   | Investigation of physiological symptoms is important to diagnose and treat in the presence of behavioural symptoms in people with MI.                                                                                                      |
| 30 | 2017 | Alam, A., Rachal, J., Tucci, V. T. & Moukadam, N.                                                                        | Emergency department medical clearance of patients with psychiatric or behavioral emergencies, part 2: Special psychiatric populations and considerations. | Review                                                                                                  | USA; ED | Paediatric, pregnant, and geriatric patients | All ages; divided into <13 years & >13 years old | Psychiatric and behavioural emergencies       | <ul style="list-style-type: none"> <li>The importance of a full physical workup for ED presentations with behavioural or mental health concerns.</li> <li>History taking, system reviews &amp; a full examination is necessary.</li> </ul> |
| 31 | 2014 | Meltzer, A. C., Blanchard, J. & Bregman, B.                                                                              | Depression is associated with repeat emergency department visits in patients with non-specific                                                             | Clinical study (Retrospective cohort study)                                                             | USA; ED | 987 ED patients                              | 18 years and older                               | Depression                                    | <ul style="list-style-type: none"> <li>An association was noted between abdominal pain, depression and ED attendance.</li> <li>Psychological distress tends to</li> </ul>                                                                  |



|        |          |                                                                        |                                                                                                                                                                                                     |                      |                                      |                                                     |               |                                                                         |                                                                                                                                                                                                                                  |
|--------|----------|------------------------------------------------------------------------|-----------------------------------------------------------------------------------------------------------------------------------------------------------------------------------------------------|----------------------|--------------------------------------|-----------------------------------------------------|---------------|-------------------------------------------------------------------------|----------------------------------------------------------------------------------------------------------------------------------------------------------------------------------------------------------------------------------|
|        |          |                                                                        | abdominal pain.                                                                                                                                                                                     |                      |                                      |                                                     |               |                                                                         | present in physical symptoms.                                                                                                                                                                                                    |
| 3<br>2 | 201<br>4 | Clarke, D., Usick, R., Sanderson, A., Giles-Smith, L. & Baker, J.      | Emergency department staff attitudes towards mental health consumers: A literature review and thematic content analysis.                                                                            | Literature review    | Canada; ED                           | 6 to 719 participants across 10 different countries | Not specified | MI; depression; anxiety; borderline personality disorder; self-harming. | <ul style="list-style-type: none"> <li>• Further education is important for staff to equip them to respond appropriately.</li> <li>• EDs are not the best places for consumers with existing MH to seek assistance.</li> </ul>   |
| 3<br>3 | 201<br>4 | Shefer, G., Henderson, C., Howard, L. M., Murray, J. & Thornicroft, G. | Diagnostic overshadowing and other challenges involved in the diagnostic process of patients with mental illness who present in emergency departments with physical symptoms - a qualitative study. | Qualitative          | UK; 4 EDs in urban general hospitals | 15 doctors & nurses at the EDs                      | Not specified | Psychiatric concerns                                                    | <ul style="list-style-type: none"> <li>• Importance of having consultant liaison within ED settings for MH presentations.</li> </ul>                                                                                             |
| 3<br>4 | 201<br>3 | Plant, L. D. & White, J. H.                                            | Emergency room psychiatric services: A qualitative study of nurses' experiences.                                                                                                                    | Qualitative study    | USA; Emergency room                  | Psychiatric patients at a generalist ED             | Not specified | Psychiatric issues (not further described)                              | <ul style="list-style-type: none"> <li>• Experiences of powerlessness by treating clinician due to limited training/knowledge/experience.</li> <li>• Barriers in the ED setting that result in complex presentations.</li> </ul> |
| 3<br>5 | 201<br>3 | Van Nieuwenhuizen, A., Henderson, C., Kassam, A., Graham, T., Murray,  | Emergency department staff views and experiences on diagnostic overshadowing related to people with mental illness.                                                                                 | Qualitative analysis | UK; ED                               | 25 ED clinicians                                    | Not specified | Psychiatric illness; Mental illness including schizophrenia;            | <ul style="list-style-type: none"> <li>• Difficulties with the 4- hour target to provide appropriate physical &amp; MH care within busy ED settings.</li> <li>• Avoidance of consumers with</li> </ul>                           |

|    |      | J., Howard, L. M. & Thornicroft, G.        |                                                                                       |                            |         |                 |        |                                                | MH background/s.                                                                                                                                    |
|----|------|--------------------------------------------|---------------------------------------------------------------------------------------|----------------------------|---------|-----------------|--------|------------------------------------------------|-----------------------------------------------------------------------------------------------------------------------------------------------------|
| 36 | 2012 | Shah, S. J., Fiorito, M. & Mcnamara, R. M. | A screening tool to medically clear psychiatric patients in the emergency department. | Retrospective chart review | USA; ED | 500 ED patients | Adults | Psychiatric complaints (not further specified) | Screening tools are useful within busy ED settings to rule out any physical concerns for consumers with psychiatric symptoms of organic conditions. |

## References

1. Sebbag, *The world-wide burden of musculoskeletal diseases: a systematic analysis of the World Health Organization Burden of Diseases Database Annals of the Rheumatic Diseases 2019*;78:844-848. *Annals of the Rheumatic Diseases.*, 2019. **78**: p. 844 - 848.
2. Murray, C.J., et al. , *UK health performance: findings of the Global Burden of Disease Study 2010*. *Lancet*, 2013. **9871**: p. 997-1020.
3. Walton, D.M., *An overview of systematic reviews on prognostic factors in neck pain: results from the international collaboration on neck pain (ICON) project*. *Open Orthop. J.*, 2013. **7**: p. 494-505.
4. Keefe, F., Abernethy, AP and Campbell, LC, *Psychological Approaches to Understanding and Treating Disease-Related Pain*. *Annual Review of Psychology*, 2005. **56**(1): p. 601-630.
5. El-Tallawy, S.N., Nalamasu, R., Salem, G. I., LeQuang, J. A. K., Pergolizzi, J. V., & Christo, P. J., *Management of Musculoskeletal Pain: An Update with Emphasis on Chronic Musculoskeletal Pain*. *Pain and therapy* 2021. **10**(1): p. 181-209.
6. Gerstman, B., Chou, K. & Burke, Lindsay., *Pain Care Essentials and Innovations: Chapter 6. Musculoskeletal Pain*. 2021: Elsevier. 73-89.
7. Caneiro JP, R.E., Barton CJ, et al, *It is time to move beyond 'body region silos' to manage musculoskeletal pain: five actions to change clinical practice*. *British Journal of Sports Medicine*, 2020. **54**: p. 438-439.
8. Blanpied, P.R., Gross, A. R., Elliott, J. M., Devaney, L. L., Clewley, D., Walton, D. M., Sparks, C., & Robertson, E. K., *Neck Pain: Revision 2017*. *The Journal of orthopaedic and sports physical therapy*, 2017. **47**(7): p. A1-A83.
9. Collaborators, G.L.B.P., *Global, regional, and national burden of low back pain, 1990-2020, its attributable risk factors, and projections to 2050: a systematic analysis of the Global Burden of Disease Study 2021*. . *The Lancet. Rheumatology*, 2023. **5**(6): p. e316-e329.
10. Côté, P., Wong, J. J., Sutton, D., Shearer, H. M., Mior, S., Randhawa, K., Ameis, A., Carroll, L. J., Nordin, M., Yu, H., Lindsay, G. M., Southerst, D., Varatharajan, S., Jacobs, C., Stupar, M., Taylor-Vaisey, A., van der Velde, G., Gross, D. P., Brison, R. J., Paulden, M., ... Salhany, R. , *Management of neck pain and associated disorders: A clinical practice guideline from the Ontario Protocol for Traffic Injury Management (OPTIMa) Collaboration*. *European spine journal : official publication of the European Spine Society, the European Spinal Deformity Society, and the European Section of the Cervical Spine Research Society*, 2016. **25**(7): p. 2000-2022.
11. Williams, C.M., et al., *Low back pain and best practice care: A survey of general practice physicians*. *Arch Intern Med*, 2010. **170**(3): p. 271-7.
12. Bandong, A.N., et al., *Adoption and use of guidelines for whiplash: an audit of insurer and health professional practice in New South Wales, Australia*. *BMC Health Serv Res*, 2018. **18**(1): p. 622.
13. Kemp JL and M.A. Risberg, *Significant Knowledge Gaps Between Clinical Practice and Research on Femoroacetabular Impingement: Are We on the Same Path?* . *J Orthop Sports Phys Ther.*, 2018. **48**(4): p. 228-229.
14. Griffin, A., et al., *Evidence-based care in high- and low-risk groups following whiplash injury: a multi-centre inception cohort study*. *BMC Health Serv Res*, 2019. **19**(1): p. 806.
15. Lexne, E., Nylander, P.-O., Brudin, L., Marteinsdottir, I. & Strain, J. J., *Psychiatric symptoms among patients with acute abdominal pain : Patients with organic dyspepsia report more psychiatric symptoms and rate poorer general health compared to patients with other specific abdominal diagnoses and non-specific abdominal pain at an emergency ward*. . *Scandinavian Journal of Gastroenterology*,, 2020. **55**(7): p. 769-76.
16. Bijker L, S.-K.M., Coppieters MW, Cuijpers P, Scholten-Peeters GGM., *Preferred Self-Administered Questionnaires to Assess Depression, Anxiety and Somatization in People With*

- Musculoskeletal Pain - A Modified Delphi Study*. The journal of pain. , 2020. **21**(3-4): p. 409-17.
17. Popay, J., Roberts, H., Sowden, A., et al. , *Guidance on the conduct of narrative synthesis in systematic reviews: a product from the ESRC methods programme*. 2006: Lancaster University
  18. Felix F, O.E., Silva SC, Agualusa L. , *The Overuse of the Emergency Department at a Multidisciplinary Pain Clinic by Patients with Chronic Pain: A Cross-Sectional Study*. Cureus., 2023. **15**(1): p. e33757.
  19. Mose, S., Kent, P., Smith, A., Andersen, J. H. & Christiansen, D. H. , *Number of musculoskeletal pain sites leads to increased long-term healthcare contacts and healthcare related costs – a Danish population-based cohort study*. BMC Health Services Research, 2021. **21**(1): p. 980.
  20. Meltzer, A.C., Blanchard, J. & Bregman, B., *Depression is associated with repeat emergency department visits in patients with non-specific abdominal pain*. . Western Journal of Emergency Medicine, 2014. **15**(3): p. 325-28.
  21. Lillis T.A., B.J., Aranda F., Purim-Shem-Tov Y.A., Bruehl S., Beckham J.C., Hobfoll S.E. , *PTSD symptoms and acute pain in the emergency department: The roles of vulnerability and resilience factors among low-income, inner-city women*. . The Clinical Journal of Pain., 2018. **34**(11): p. 1000-7
  22. Pears EM, C.T., Kuehn SJ, Valan B, Rowe DG, Hurley ET, et al. , *The association of pre-existing mental health conditions and patient outcomes after lower extremity orthopaedic trauma: a scoping review*. . European Journal of Orthopaedic Surgery & Traumatology., 2023.
  23. McLean, S.A., Ressler, K., Koenen, K. C., Neylan, T., Germine, L., Jovanovic, T., Clifford, G. D., Zeng, D., An, X., Linnstaedt, S., Beaudoin, F., House, S., Bollen, K. A., Musey, P., Hendry, P., Jones, C. W., Lewandowski, C., Swor, R., Datner, E., Mohiuddin, K., ... Kessler, R. , *The AURORA Study: a longitudinal, multimodal library of brain biology and function after traumatic stress exposure*. Molecular psychiatry, 2020. **25**(2): p. 283-296.
  24. Oliveira JeSL, P.S.D., Meltzer A.C., Broder J.S., Gerber D.J., Upadhye S., et al. , *Depression and anxiety screening in emergency department patients with recurrent abdominal pain: An evidence synthesis for a clinical practice guideline*. Academic Emergency Medicine, 2022. **29**(5): p. 615-29.
  25. Ulirsch, J.C., Weaver, M. A., Bortsov, A. V., Soward, A. C., Swor, R. A., Peak, D. A., Jones, J. S., Rathlev, N. K., Lee, D. C., Domeier, R. M., Hendry, P. L., & McLean, S. A., *No man is an island: living in a disadvantaged neighborhood influences chronic pain development after motor vehicle collision*. Pain, 2014. **155**(10): p. 2116–2123.
  26. Wally, M.K., Hsu, J. R., Seymour, R. B., *Musculoskeletal Pain Management and Patient Mental Health and Well-being*. Journal of Orthopaedic Trauma, 2022. **36**(1): p. S19-24.
  27. campbell.
  28. Blind F, M.J., Karp J, Oldano K, Homa K, Blanco A, et al. , *Evaluation of the use of individualized patient care plans in frequent emergency department visitors with pain complaints*. International Journal of Emergency Medicine. , 2022. **15**(1): p. 1-7.
  29. Corscadden L., C.E.J., Topp S.M., Watson D.E., *Disparities in experiences of emergency department care for people with a mental health condition*. Australasian emergency care., 2021. **24**(1): p. 11-19.
  30. Nash, M., *Diagnostic overshadowing: A potential barrier to physical health care for mental health service users*. Mental Health Practice, 2013. **17**(4): p. 22-26.
  31. Molloy R, M.I., Pope N. , *Understanding the experience of diagnostic overshadowing associated with severe mental illness from the consumer and health professional perspective: a qualitative systematic review protocol*. JBI Evidence Synthesis 2021. **19**(6): p. 1362-8.
  32. Shefer, G., Henderson, C., Howard, L. M., Murray, J. & Thornicroft, G. , *Diagnostic overshadowing and other challenges involved in the diagnostic process of patients with*

- mental illness who present in emergency departments with physical symptoms - a qualitative study.* PLoS ONE 2014. **9**(11): p. e111682.
33. Eze, B., Kumar, S., Yang, Y., Kilcoyne, J., Starkweather, A. & Perry, M. A., *Bias in musculoskeletal pain management and bias-targeted interventions to improve pain outcomes: A scoping review.* . 2022.
  34. O'Connell F, O.N., Saliba Z, Mortimer N, Pourmand A., *Reduced pain perception in patients with schizophrenia; A missed case of hand fracture.* American Journal of Emergency Medicine., 2021. **49**: p. 440 e1 - 440 e3.
  35. Bueter, A., *Diagnostic overshadowing in psychiatric-somatic comorbidity: A case for structural testimonial injustice.* Erkenntnis, 2021. **88**(3): p. 1135-55.
  36. Lee KC, C.S., Eisig SB., *Is Psychiatric Illness Associated With the Clinical Decision to Treat Facial Fractures?* . Journal of Oral and Maxillofacial Surgery., 2021. **79**(12): p. 2519-27.
  37. Henriques V, H.S.C.R.i.P., *Algoneurodystrophy in a Patient with Major Depressive Disorder.* 2021: p. 9981521.
  38. Cvejic RC, S.P., Walker AR, Reppermund S, Lappin JM, Curtis J, et al., *The health service contact patterns of people with psychotic and non-psychotic forms of severe mental illness in New South Wales, Australia: A record-linkage study.* Australian and New Zealand Journal of Psychiatry., 2022. **56**(6): p. 675-85.
  39. Geiss, M., Chamberlain, J., Weaver, T., McCormick, C., Raufer, A., Scoggins, L., Petersen, L., Davis, S. & Edmonson, D. , *Diagnostic overshadowing of the psychiatric population in the emergency department: Physiological factors identified for an early warning system.* Journal of the American Psychiatric Nurses Association, 2018. **24**(4): p. 327-31.
  40. Van Nieuwenhuizen, A., Henderson, C., Kassam, A., Graham, T., Murray, J., Howard, L. M. & Thornicroft, G. , *Emergency department staff views and experiences on diagnostic overshadowing related to people with mental illness.* Epidemiology and Psychiatric Sciences, 2013. **22**(3): p. 255-262.
  41. Davidson SRE, B.K., Kamper SJ, Haskins R, Petkovic D, Feenan N, et al. , *Perspectives of emergency department clinicians on the challenges of addressing low back pain in the emergency setting: A qualitative study.* Emergency Medicine Australasia. , 2022. **34**(2): p. 199-208.
  42. Gonzales L, L.-A.L., McCullough B., *Variation in provider attitudes and treatment recommendations for individuals with schizophrenia and additional marginalized identities: A mixed-method study.* . Psychiatric rehabilitation journal., 2021. **44**(2): p. 107-17.
  43. Clarke D, U.R., Sanderson A, Giles-Smith L, Baker J. , *Emergency department staff attitudes towards mental health consumers: a literature review and thematic content analysis.* . International journal of mental health nursing. , 2014. **23**(3): p. 273-84.
  44. C.L., B., *Emergency nurses' perceived barriers to demonstrating caring when managing adult patients' pain.* Journal of emergency nursing. , 2012. **1**(3): p. 218- 225.
  45. Plant L.D., W.J.H., *Emergency room psychiatric services: A qualitative study of nurses' experiences.* . Issues in Mental Health Nursing. , 2013. **34**(4): p. 240-8.
  46. Ee, C., Lake, J., Firth, J. et al., *An integrative collaborative care model for people with mental illness and physical comorbidities.* Int J Ment Health Syst. , 2020. **14**(83).
  47. Burns, J.W., Janssen, I., Lillis, T., Mulcahy, M., Purim-Shem-Tov, Y. A., Bruehl, S., Burgess, H. J., Fischer, A., Rim, K., Aranda, F., Pinkerton, L., & Hobfoll, S. , *The transition from acute to persistent pain: the identification of distinct trajectories among women presenting to an emergency department.* . Pain, 2020. **161**(11): p. 2511-2519.
